# Supplementary material
Source: PubMed Central journal article supplement (PMC3783583)
Supplement: NIHMS502102-supplement-01.pdf [file NIHMS502102-supplement-01.pdf]

## Supplemental Figure legends

**Figure 1.** Data entry screen for magnetic resonance venography used for structured interpretation of the images by LAK who could not use or view any other data entry/display screens of the database interface program. Password protected, user specific limited access to the secured server prevented anyone other than LAK, KT and JSW to access this portion of the database and these entries were user, date and time stamped.

**Figure 2.** Data entry screen for transluminal venography used for structured interpretation of the venograms by AMC who could not use or view any other data entry/display screens of the database interface program. Password protected, user specific limited access to the secured server prevented anyone other than AMC, KT and JSW to access this portion of the database and these entries were user, date and time stamped.

**Magnetic Resonance Venography**

Patient ID: 0081

Optic Sheath Diameter:  
Right Eye: 5.1 (mm)  
Left Eye: 4.9 (mm)

CSF Analysis:  
BPM: 54  
Stroke Volume: 0.0015 (ml)  
CSF Production Rate: 81 (uL/min)  
Peak Systolic CSF Velocity: 18 (cm/s)  
Time to Peak Systolic Velocity: 330 (mms)  
CSF Waveform Shape: Type A (Narrow)

Venous Stenosis Pattern a la Zamboni:  
 Type A pattern - is characterized by a stenoobstruction of the proximal AZY associated with a closed stenosis of one of the two IJVs, with a compensatory controlateral IJV that appears with an ample cross-sectional area.  
 Type B pattern - is characterized by significant stenoses of both IJVs and the proximal azygous.  
 Type C pattern - is characterized by bilateral stenosis in both IJVs, with a normal AZY system.  
 Type D pattern - is characterized by the multilevel involvement of the AZY and lumbar systems.  
 Normal Venogram

Presence of Valves Internal Jugular:  
 Unilateral Jugular  
 Bilateral Jugular  
 None  
 Not Coded

Naom Alperin Technique:  
Intracranial CSF pressure: (cmH2O)

Intracranial Venous Outflow  
Right Internal Jugular Vein Flow (ml/min)  
Left Internal Jugular Vein Flow (ml/min)

Critical Finding:  
 NO  
 YES

Finalize/Agree by: lkramer

Comment:  
Bilateral internal jugular stenoses with mild collateralization. Azygous patent. Intrahepatic IVC mildly narrowed.

Save Search Close

Figure 1. Data entry screen for magnetic resonance venography used for structured interpretation of the images by LAK who could not use or view any other data entry/display screens of the database interface program. Password protected, user specific limited access to the secured server prevented anyone other than LAK, KT and JSW to access this portion of the database and these entries were user, date and time stamped.  
196x209mm (120 x 120 DPI)

Transluminal Venography

Patient ID 0074

**Sterosis**

|                       | Sterosis                 | Percent | Pressure Gradient across sterosis (mmHg) |
|-----------------------|--------------------------|---------|------------------------------------------|
| Left IJ               | NO                       |         |                                          |
| Left Innominate Vein  | NO                       |         |                                          |
| Right IJ              | YES                      | 40%     | 0                                        |
| Right Innominate Vein | NO                       |         |                                          |
| Azygos Vein           | NO                       |         |                                          |
| Right Iliac           | YES                      |         |                                          |
| Left Iliac            |                          |         |                                          |
| Right Lumbar          | <input type="checkbox"/> |         |                                          |
| Left Lumbar           | <input type="checkbox"/> |         |                                          |

**Valves**

|                       | Valves                   | Percent | Pressure Gradient across valves (mmHg) |
|-----------------------|--------------------------|---------|----------------------------------------|
| Left IJ               | YES                      | 0%      | 0                                      |
| Left Innominate Vein  | NO                       |         |                                        |
| Right IJ              | YES                      | 30%     | 0                                      |
| Right Innominate Vein | NO                       |         |                                        |
| Azygos Vein           | YES                      | 0%      | 0                                      |
| Right Iliac           | NO                       |         |                                        |
| Left Iliac            |                          |         |                                        |
| Right Lumbar          | <input type="checkbox"/> |         |                                        |
| Left Lumbar           | <input type="checkbox"/> |         |                                        |

**Webs**

|                       | Webs                     | Percent | Pressure Gradient across webs (mmHg) |
|-----------------------|--------------------------|---------|--------------------------------------|
| Left IJ               | NO                       |         |                                      |
| Left Innominate Vein  | NO                       |         |                                      |
| Right IJ              | NO                       |         |                                      |
| Right Innominate Vein | NO                       |         |                                      |
| Azygos Vein           | NO                       |         |                                      |
| Right Iliac           | NO                       |         |                                      |
| Left Iliac            |                          |         |                                      |
| Right Lumbar          | <input type="checkbox"/> |         |                                      |
| Left Lumbar           | <input type="checkbox"/> |         |                                      |

Comment  
pressure measurments in mm Hg: IJ 2, L innom v 2, SVC, azygos 2, RA 1, RIJ 2, Rt innom v 2, IVC 3

Finalize/Agree by: acohen

Save Search Close

Figure 2. Data entry screen for transluminal venography used for structured interpretation of the venograms by AMC who could not use or view any other data entry/display screens of the database interface program. Password protected, user specific limited access to the secured server prevented anyone other than AMC, KT and JSW to access this portion of the database and these entries were user, date and time stamped.

241x225mm (120 x 120 DPI)
